# Supplementary material for: Effect of Minocycline on Depressive Symptoms in Patients With Treatment-Resistant Depression: A Randomized Clinical Trial
Source: PubMed Central journal article supplement (PMC9475381; doi:10.1001/jamanetworkopen.2022.30367), 2022-09-14
Supplement: jamanetwopen-e2230367-s003.pdf [file jamanetwopen-e2230367-s003.pdf]

## Data Sharing Statement

Hellmann-Regen J, Clemens V, Grözinger M, et al. Effect of minocycline on depressive symptoms in patients with treatment-resistant depression: a randomized clinical trial. *JAMA Netw Open*. 2022;5(9):e2230367. doi:10.1001/jamanetworkopen.2022.30367

### Data

**Data available:** Yes

**Data types:** Deidentified participant data

**How to access data:** [isabella.heuser@charite.de](mailto:isabella.heuser@charite.de)

**When available:** With publication

### Supporting Documents

**Document types:** None

### Additional Information

**Who can access the data:** researchers whose proposed use of the data has been approved

**Types of analyses:** for secondary analyses, metaanalyses

**Mechanisms of data availability:** with investigator support
